# Supplementary material for: Theoretical Determination of High-Energy Photon Attenuation and Recommended Protective Filler Contents for Flexible and Enhanced Dimensionally Stable Wood/NR and NR Composites
Source: PubMed Central journal article supplement (PMC7998293; doi:10.3390/polym13060869), 2021-03-11
Supplement: polymers-13-00869-s001.pdf [file polymers-13-00869-s001.pdf]

## **Theoretical determination of high-energy photon attenuation and recommended protective-filler contents for flexible and enhanced dimensionally stable wood/NR and NR composites**

**Worawat Poltabtim <sup>1</sup>, Donruedee Toyen <sup>2</sup> and Kiadtisak Saenboonruang <sup>1,3\*</sup>**

<sup>1</sup> Department of Applied Radiation and Isotopes, Faculty of Science, Kasetsart University, Bangkok, Thailand 10900; wp.worawat@gmail.com (W.P.); kiadtisak.s@ku.th (K.S.)

<sup>2</sup> Scientific Equipment and Research Division, Kasetsart University Research and Development Institute (KURDI), Kasetsart University, Bangkok, Thailand 10900; rdiddt@ku.ac.th (D.T.)

<sup>3</sup> Specialized Center of Rubber and Polymer Materials in Agriculture and Industry (RPM), Faculty of Science, Kasetsart University, Bangkok, Thailand 10900; kiadtisak.s@ku.th (K.S.)

\* Correspondence: kiadtisak.s@ku.th; Tel.: +662-562-5555 ext. 1217

**Table S1.** Mass attenuation coefficients ( $\mu_m$ ) of NR composites.

| Photon energy (MeV) | $\mu_m$ (cm <sup>2</sup> /g) |
|---------------------|------------------------------|
| 1.00E-03            | 2.05E+03                     |
| 1.01E-03            | 2.00E+03                     |
| 1.02E-03            | 1.94E+03                     |
| 1.02E-03            | 2.00E+03                     |
| 1.03E-03            | 1.97E+03                     |
| 1.04E-03            | 1.96E+03                     |
| 1.04E-03            | 2.00E+03                     |
| 1.12E-03            | 1.68E+03                     |
| 1.19E-03            | 1.41E+03                     |
| 1.19E-03            | 1.44E+03                     |
| 1.50E-03            | 7.64E+02                     |
| 2.00E-03            | 3.38E+02                     |
| 2.47E-03            | 1.84E+02                     |
| 2.47E-03            | 2.40E+02                     |
| 3.00E-03            | 1.41E+02                     |
| 4.00E-03            | 6.24E+01                     |
| 5.00E-03            | 3.29E+01                     |
| 6.00E-03            | 1.94E+01                     |
| 8.00E-03            | 8.43E+00                     |
| 9.66E-03            | 4.92E+00                     |
| 9.66E-03            | 1.05E+01                     |
| 1.00E-02            | 9.60E+00                     |
| 1.50E-02            | 3.28E+00                     |
| 2.00E-02            | 1.57E+00                     |
| 3.00E-02            | 6.24E-01                     |
| 4.00E-02            | 3.75E-01                     |
| 5.00E-02            | 2.80E-01                     |
| 6.00E-02            | 2.35E-01                     |
| 8.00E-02            | 1.93E-01                     |
| 1.00E-01            | 1.73E-01                     |
| 1.50E-01            | 1.48E-01                     |
| 2.00E-01            | 1.34E-01                     |
| 3.00E-01            | 1.15E-01                     |
| 4.00E-01            | 1.03E-01                     |
| 5.00E-01            | 9.39E-02                     |
| 6.00E-01            | 8.68E-02                     |
| 8.00E-01            | 7.62E-02                     |
| 1.00E+00            | 6.85E-02                     |
| 1.02E+00            | 6.78E-02                     |
| 1.25E+00            | 6.13E-02                     |
| 1.50E+00            | 5.58E-02                     |
| 2.00E+00            | 4.78E-02                     |
| 2.04E+00            | 4.73E-02                     |
| 3.00E+00            | 3.84E-02                     |
| 4.00E+00            | 3.28E-02                     |

5.00E+00

2.92E-02

**Table S2.** Mass attenuation coefficients ( $\mu_m$ ) of 400-phr-Bi<sub>2</sub>O<sub>3</sub>/NR composites.

| Photon energy (MeV) | $\mu_m$ (cm <sup>2</sup> /g) |
|---------------------|------------------------------|
| 1.00E-03            | 4.42E+03                     |
| 1.01E-03            | 4.33E+03                     |
| 1.02E-03            | 4.24E+03                     |
| 1.02E-03            | 4.26E+03                     |
| 1.03E-03            | 4.17E+03                     |
| 1.04E-03            | 4.08E+03                     |
| 1.04E-03            | 4.10E+03                     |
| 1.12E-03            | 3.56E+03                     |
| 1.19E-03            | 3.09E+03                     |
| 1.19E-03            | 3.10E+03                     |
| 1.50E-03            | 1.92E+03                     |
| 2.00E-03            | 1.02E+03                     |
| 2.47E-03            | 6.26E+02                     |
| 2.47E-03            | 6.42E+02                     |
| 2.53E-03            | 6.11E+02                     |
| 2.58E-03            | 5.83E+02                     |
| 2.58E-03            | 1.23E+03                     |
| 2.63E-03            | 1.25E+03                     |
| 2.69E-03            | 1.27E+03                     |
| 2.69E-03            | 1.74E+03                     |
| 3.00E-03            | 1.38E+03                     |
| 3.18E-03            | 1.19E+03                     |
| 3.18E-03            | 1.37E+03                     |
| 3.43E-03            | 1.13E+03                     |
| 3.70E-03            | 9.42E+02                     |
| 3.70E-03            | 9.96E+02                     |
| 3.85E-03            | 9.06E+02                     |
| 4.00E-03            | 8.25E+02                     |
| 4.00E-03            | 8.60E+02                     |
| 4.00E-03            | 8.59E+02                     |
| 5.00E-03            | 5.01E+02                     |
| 6.00E-03            | 3.20E+02                     |
| 8.00E-03            | 1.56E+02                     |
| 9.66E-03            | 9.74E+01                     |
| 9.66E-03            | 9.90E+01                     |
| 1.00E-02            | 9.07E+01                     |
| 1.34E-02            | 4.32E+01                     |
| 1.34E-02            | 1.02E+02                     |
| 1.50E-02            | 7.57E+01                     |
| 1.57E-02            | 6.71E+01                     |
| 1.57E-02            | 9.21E+01                     |
| 1.61E-02            | 8.77E+01                     |
| 1.64E-02            | 8.34E+01                     |

|          |          |
|----------|----------|
| 1.64E-02 | 9.60E+01 |
| 2.00E-02 | 5.82E+01 |
| 3.00E-02 | 2.05E+01 |
| 4.00E-02 | 9.75E+00 |
| 5.00E-02 | 5.49E+00 |
| 6.00E-02 | 3.45E+00 |
| 8.00E-02 | 1.69E+00 |
| 9.05E-02 | 1.26E+00 |
| 9.05E-02 | 4.82E+00 |
| 1.00E-01 | 3.76E+00 |
| 1.50E-01 | 1.39E+00 |
| 2.00E-01 | 7.12E-01 |
| 3.00E-01 | 3.09E-01 |
| 4.00E-01 | 1.90E-01 |
| 5.00E-01 | 1.40E-01 |
| 6.00E-01 | 1.13E-01 |
| 8.00E-01 | 8.49E-02 |
| 1.00E+00 | 7.05E-02 |
| 1.02E+00 | 6.93E-02 |
| 1.25E+00 | 5.98E-02 |
| 1.50E+00 | 5.36E-02 |
| 2.00E+00 | 4.68E-02 |
| 2.04E+00 | 4.64E-02 |
| 3.00E+00 | 4.10E-02 |
| 4.00E+00 | 3.89E-02 |
| 5.00E+00 | 3.81E-02 |

**Table S3.** Mass attenuation coefficients ( $\mu_m$ ) of 800-phr-Bi<sub>2</sub>O<sub>3</sub>/NR composites.

| <b>Photon energy (MeV)</b> | <b><math>\mu_m</math> (cm<sup>2</sup>/g)</b> |
|----------------------------|----------------------------------------------|
| 1.00E-03                   | 4.81E+03                                     |
| 1.01E-03                   | 4.72E+03                                     |
| 1.02E-03                   | 4.62E+03                                     |
| 1.02E-03                   | 4.63E+03                                     |
| 1.03E-03                   | 4.53E+03                                     |
| 1.04E-03                   | 4.43E+03                                     |
| 1.04E-03                   | 4.44E+03                                     |
| 1.12E-03                   | 3.87E+03                                     |
| 1.19E-03                   | 3.37E+03                                     |
| 1.19E-03                   | 3.37E+03                                     |
| 1.50E-03                   | 2.11E+03                                     |
| 2.00E-03                   | 1.13E+03                                     |
| 2.47E-03                   | 6.98E+02                                     |
| 2.47E-03                   | 7.08E+02                                     |
| 2.53E-03                   | 6.75E+02                                     |
| 2.58E-03                   | 6.43E+02                                     |
| 2.58E-03                   | 1.40E+03                                     |
| 2.63E-03                   | 1.42E+03                                     |

|          |          |
|----------|----------|
| 2.69E-03 | 1.45E+03 |
| 2.69E-03 | 1.99E+03 |
| 3.00E-03 | 1.58E+03 |
| 3.18E-03 | 1.37E+03 |
| 3.18E-03 | 1.57E+03 |
| 3.43E-03 | 1.30E+03 |
| 3.70E-03 | 1.08E+03 |
| 3.70E-03 | 1.15E+03 |
| 3.85E-03 | 1.04E+03 |
| 4.00E-03 | 9.50E+02 |
| 4.00E-03 | 9.91E+02 |
| 4.00E-03 | 9.90E+02 |
| 5.00E-03 | 5.78E+02 |
| 6.00E-03 | 3.70E+02 |
| 8.00E-03 | 1.81E+02 |
| 9.66E-03 | 1.13E+02 |
| 9.66E-03 | 1.14E+02 |
| 1.00E-02 | 1.04E+02 |
| 1.34E-02 | 4.96E+01 |
| 1.34E-02 | 1.18E+02 |
| 1.50E-02 | 8.76E+01 |
| 1.57E-02 | 7.76E+01 |
| 1.57E-02 | 1.07E+02 |
| 1.61E-02 | 1.02E+02 |
| 1.64E-02 | 9.67E+01 |
| 1.64E-02 | 1.11E+02 |
| 2.00E-02 | 6.74E+01 |
| 3.00E-02 | 2.38E+01 |
| 4.00E-02 | 1.13E+01 |
| 5.00E-02 | 6.35E+00 |
| 6.00E-02 | 3.98E+00 |
| 8.00E-02 | 1.94E+00 |
| 9.05E-02 | 1.44E+00 |
| 9.05E-02 | 5.58E+00 |
| 1.00E-01 | 4.34E+00 |
| 1.50E-01 | 1.60E+00 |
| 2.00E-01 | 8.07E-01 |
| 3.00E-01 | 3.40E-01 |
| 4.00E-01 | 2.04E-01 |
| 5.00E-01 | 1.47E-01 |
| 6.00E-01 | 1.17E-01 |
| 8.00E-01 | 8.64E-02 |
| 1.00E+00 | 7.08E-02 |
| 1.02E+00 | 6.96E-02 |
| 1.25E+00 | 5.96E-02 |
| 1.50E+00 | 5.32E-02 |
| 2.00E+00 | 4.66E-02 |
| 2.04E+00 | 4.62E-02 |

|          |          |
|----------|----------|
| 3.00E+00 | 4.15E-02 |
| 4.00E+00 | 3.99E-02 |
| 5.00E+00 | 3.96E-02 |

**Table S4.** Mass attenuation coefficients ( $\mu_m$ ) of 400-phr-Pb/NR composites.

| Photon energy (MeV) | $\mu_m$ (cm <sup>2</sup> /g) |
|---------------------|------------------------------|
| 1.00E-03            | 4.32E+03                     |
| 1.01E-03            | 4.23E+03                     |
| 1.02E-03            | 4.15E+03                     |
| 1.02E-03            | 4.16E+03                     |
| 1.03E-03            | 4.08E+03                     |
| 1.04E-03            | 4.00E+03                     |
| 1.04E-03            | 4.01E+03                     |
| 1.12E-03            | 3.49E+03                     |
| 1.19E-03            | 3.04E+03                     |
| 1.19E-03            | 3.05E+03                     |
| 1.50E-03            | 1.91E+03                     |
| 2.00E-03            | 1.02E+03                     |
| 2.47E-03            | 6.33E+02                     |
| 2.47E-03            | 6.49E+02                     |
| 2.53E-03            | 6.45E+02                     |
| 2.58E-03            | 6.42E+02                     |
| 2.58E-03            | 1.07E+03                     |
| 2.63E-03            | 1.25E+03                     |
| 2.69E-03            | 1.46E+03                     |
| 2.69E-03            | 1.82E+03                     |
| 3.00E-03            | 1.45E+03                     |
| 3.18E-03            | 1.37E+03                     |
| 3.18E-03            | 1.58E+03                     |
| 3.43E-03            | 1.32E+03                     |
| 3.70E-03            | 1.10E+03                     |
| 3.70E-03            | 1.16E+03                     |
| 3.85E-03            | 1.06E+03                     |
| 4.00E-03            | 9.61E+02                     |
| 4.00E-03            | 1.00E+03                     |
| 4.00E-03            | 9.16E+02                     |
| 5.00E-03            | 5.34E+02                     |
| 6.00E-03            | 3.41E+02                     |
| 8.00E-03            | 1.67E+02                     |
| 9.66E-03            | 1.04E+02                     |
| 9.66E-03            | 1.05E+02                     |
| 1.00E-02            | 9.65E+01                     |
| 1.34E-02            | 4.94E+01                     |
| 1.34E-02            | 1.18E+02                     |
| 1.50E-02            | 8.10E+01                     |
| 1.57E-02            | 7.83E+01                     |

|          |          |
|----------|----------|
| 1.57E-02 | 1.08E+02 |
| 1.61E-02 | 1.02E+02 |
| 1.64E-02 | 9.73E+01 |
| 1.64E-02 | 1.12E+02 |
| 2.00E-02 | 6.25E+01 |
| 3.00E-02 | 2.19E+01 |
| 4.00E-02 | 1.04E+01 |
| 5.00E-02 | 5.85E+00 |
| 6.00E-02 | 3.67E+00 |
| 8.00E-02 | 1.79E+00 |
| 9.05E-02 | 1.42E+00 |
| 9.05E-02 | 5.57E+00 |
| 1.00E-01 | 4.03E+00 |
| 1.50E-01 | 1.49E+00 |
| 2.00E-01 | 7.55E-01 |
| 3.00E-01 | 3.22E-01 |
| 4.00E-01 | 1.96E-01 |
| 5.00E-01 | 1.42E-01 |
| 6.00E-01 | 1.14E-01 |
| 8.00E-01 | 8.52E-02 |
| 1.00E+00 | 7.03E-02 |
| 1.02E+00 | 6.91E-02 |
| 1.25E+00 | 5.95E-02 |
| 1.50E+00 | 5.32E-02 |
| 2.00E+00 | 4.66E-02 |
| 2.04E+00 | 4.62E-02 |
| 3.00E+00 | 4.12E-02 |
| 4.00E+00 | 3.94E-02 |
| 5.00E+00 | 3.89E-02 |

**Table S5.** Mass attenuation coefficients ( $\mu_m$ ) of 800-phr-Pb/NR composites.

| Photon energy (MeV) | $\mu_m$ (cm <sup>2</sup> /g) |
|---------------------|------------------------------|
| 1.00E-03            | 4.69E+03                     |
| 1.01E-03            | 4.60E+03                     |
| 1.02E-03            | 4.51E+03                     |
| 1.02E-03            | 4.52E+03                     |
| 1.03E-03            | 4.42E+03                     |
| 1.04E-03            | 4.33E+03                     |
| 1.04E-03            | 4.34E+03                     |
| 1.12E-03            | 3.79E+03                     |
| 1.19E-03            | 3.31E+03                     |
| 1.19E-03            | 3.32E+03                     |
| 1.50E-03            | 2.10E+03                     |
| 2.00E-03            | 1.13E+03                     |
| 2.47E-03            | 7.07E+02                     |
| 2.47E-03            | 7.16E+02                     |
| 2.53E-03            | 7.12E+02                     |

|          |          |
|----------|----------|
| 2.58E-03 | 7.08E+02 |
| 2.58E-03 | 1.21E+03 |
| 2.63E-03 | 1.41E+03 |
| 2.69E-03 | 1.66E+03 |
| 2.69E-03 | 2.08E+03 |
| 3.00E-03 | 1.67E+03 |
| 3.18E-03 | 1.57E+03 |
| 3.18E-03 | 1.82E+03 |
| 3.43E-03 | 1.52E+03 |
| 3.70E-03 | 1.26E+03 |
| 3.70E-03 | 1.34E+03 |
| 3.85E-03 | 1.22E+03 |
| 4.00E-03 | 1.11E+03 |
| 4.00E-03 | 1.16E+03 |
| 4.00E-03 | 1.06E+03 |
| 5.00E-03 | 6.16E+02 |
| 6.00E-03 | 3.94E+02 |
| 8.00E-03 | 1.93E+02 |
| 9.66E-03 | 1.20E+02 |
| 9.66E-03 | 1.21E+02 |
| 1.00E-02 | 1.11E+02 |
| 1.34E-02 | 5.68E+01 |
| 1.34E-02 | 1.36E+02 |
| 1.50E-02 | 9.38E+01 |
| 1.57E-02 | 9.06E+01 |
| 1.57E-02 | 1.25E+02 |
| 1.61E-02 | 1.19E+02 |
| 1.64E-02 | 1.13E+02 |
| 1.64E-02 | 1.30E+02 |
| 2.00E-02 | 7.25E+01 |
| 3.00E-02 | 2.54E+01 |
| 4.00E-02 | 1.21E+01 |
| 5.00E-02 | 6.77E+00 |
| 6.00E-02 | 4.23E+00 |
| 8.00E-02 | 2.05E+00 |
| 9.05E-02 | 1.63E+00 |
| 9.05E-02 | 6.45E+00 |
| 1.00E-01 | 4.67E+00 |
| 1.50E-01 | 1.71E+00 |
| 2.00E-01 | 8.57E-01 |
| 3.00E-01 | 3.56E-01 |
| 4.00E-01 | 2.11E-01 |
| 5.00E-01 | 1.50E-01 |
| 6.00E-01 | 1.19E-01 |
| 8.00E-01 | 8.67E-02 |
| 1.00E+00 | 7.06E-02 |
| 1.02E+00 | 6.93E-02 |
| 1.25E+00 | 5.92E-02 |



|          |          |
|----------|----------|
| 1.50E+00 | 5.28E-02 |
| 2.00E+00 | 4.64E-02 |
| 2.04E+00 | 4.60E-02 |
| 3.00E+00 | 4.17E-02 |
| 4.00E+00 | 4.05E-02 |
| 5.00E+00 | 4.05E-02 |

**Table S6.** Mass attenuation coefficients ( $\mu_m$ ) of 400-phr-Bi<sub>2</sub>S<sub>3</sub>/NR composites.

| <b>Photon energy (MeV)</b> | <b><math>\mu_m</math> (cm<sup>2</sup>/g)</b> |
|----------------------------|----------------------------------------------|
| 1.00E-03                   | 4.08E+03                                     |
| 1.01E-03                   | 4.00E+03                                     |
| 1.02E-03                   | 3.92E+03                                     |
| 1.02E-03                   | 3.93E+03                                     |
| 1.03E-03                   | 3.85E+03                                     |
| 1.04E-03                   | 3.77E+03                                     |
| 1.04E-03                   | 3.78E+03                                     |
| 1.12E-03                   | 3.28E+03                                     |
| 1.19E-03                   | 2.85E+03                                     |
| 1.19E-03                   | 2.86E+03                                     |
| 1.50E-03                   | 1.77E+03                                     |
| 2.00E-03                   | 9.34E+02                                     |
| 2.47E-03                   | 5.76E+02                                     |
| 2.47E-03                   | 8.40E+02                                     |
| 2.53E-03                   | 8.02E+02                                     |
| 2.58E-03                   | 7.64E+02                                     |
| 2.58E-03                   | 1.35E+03                                     |
| 2.63E-03                   | 1.36E+03                                     |
| 2.69E-03                   | 1.37E+03                                     |
| 2.69E-03                   | 1.79E+03                                     |
| 3.00E-03                   | 1.42E+03                                     |
| 3.18E-03                   | 1.23E+03                                     |
| 3.18E-03                   | 1.39E+03                                     |
| 3.43E-03                   | 1.15E+03                                     |
| 3.70E-03                   | 9.53E+02                                     |
| 3.70E-03                   | 1.00E+03                                     |
| 3.85E-03                   | 9.11E+02                                     |
| 4.00E-03                   | 8.28E+02                                     |
| 4.00E-03                   | 8.60E+02                                     |
| 4.00E-03                   | 8.59E+02                                     |
| 5.00E-03                   | 4.98E+02                                     |
| 6.00E-03                   | 3.17E+02                                     |
| 8.00E-03                   | 1.54E+02                                     |
| 9.66E-03                   | 9.54E+01                                     |
| 9.66E-03                   | 9.70E+01                                     |
| 1.00E-02                   | 8.88E+01                                     |
| 1.34E-02                   | 4.20E+01                                     |
| 1.34E-02                   | 9.52E+01                                     |

|          |          |
|----------|----------|
| 1.50E-02 | 7.07E+01 |
| 1.57E-02 | 6.26E+01 |
| 1.57E-02 | 8.53E+01 |
| 1.61E-02 | 8.11E+01 |
| 1.64E-02 | 7.72E+01 |
| 1.64E-02 | 8.86E+01 |
| 2.00E-02 | 5.36E+01 |
| 3.00E-02 | 1.89E+01 |
| 4.00E-02 | 8.96E+00 |
| 5.00E-02 | 5.05E+00 |
| 6.00E-02 | 3.17E+00 |
| 8.00E-02 | 1.56E+00 |
| 9.05E-02 | 1.16E+00 |
| 9.05E-02 | 4.39E+00 |
| 1.00E-01 | 3.42E+00 |
| 1.50E-01 | 1.28E+00 |
| 2.00E-01 | 6.58E-01 |
| 3.00E-01 | 2.90E-01 |
| 4.00E-01 | 1.82E-01 |
| 5.00E-01 | 1.35E-01 |
| 6.00E-01 | 1.10E-01 |
| 8.00E-01 | 8.38E-02 |
| 1.00E+00 | 7.00E-02 |
| 1.02E+00 | 6.88E-02 |
| 1.25E+00 | 5.97E-02 |
| 1.50E+00 | 5.35E-02 |
| 2.00E+00 | 4.67E-02 |
| 2.04E+00 | 4.63E-02 |
| 3.00E+00 | 4.08E-02 |
| 4.00E+00 | 3.84E-02 |
| 5.00E+00 | 3.75E-02 |

**Table S7.** Mass attenuation coefficients ( $\mu_m$ ) of 800-phr-Bi<sub>2</sub>S<sub>3</sub>/NR composites.

| <b>Photon energy (MeV)</b> | <b><math>\mu_m</math> (cm<sup>2</sup>/g)</b> |
|----------------------------|----------------------------------------------|
| 1.00E-03                   | 4.41E+03                                     |
| 1.01E-03                   | 4.33E+03                                     |
| 1.02E-03                   | 4.24E+03                                     |
| 1.02E-03                   | 4.25E+03                                     |
| 1.03E-03                   | 4.16E+03                                     |
| 1.04E-03                   | 4.07E+03                                     |
| 1.04E-03                   | 4.08E+03                                     |
| 1.12E-03                   | 3.55E+03                                     |
| 1.19E-03                   | 3.09E+03                                     |
| 1.19E-03                   | 3.09E+03                                     |
| 1.50E-03                   | 1.93E+03                                     |
| 2.00E-03                   | 1.03E+03                                     |
| 2.47E-03                   | 6.40E+02                                     |

|          |          |
|----------|----------|
| 2.47E-03 | 9.39E+02 |
| 2.53E-03 | 8.96E+02 |
| 2.58E-03 | 8.55E+02 |
| 2.58E-03 | 1.54E+03 |
| 2.63E-03 | 1.55E+03 |
| 2.69E-03 | 1.56E+03 |
| 2.69E-03 | 2.06E+03 |
| 3.00E-03 | 1.63E+03 |
| 3.18E-03 | 1.41E+03 |
| 3.18E-03 | 1.59E+03 |
| 3.43E-03 | 1.32E+03 |
| 3.70E-03 | 1.10E+03 |
| 3.70E-03 | 1.15E+03 |
| 3.85E-03 | 1.05E+03 |
| 4.00E-03 | 9.54E+02 |
| 4.00E-03 | 9.91E+02 |
| 4.00E-03 | 9.90E+02 |
| 5.00E-03 | 5.75E+02 |
| 6.00E-03 | 3.66E+02 |
| 8.00E-03 | 1.78E+02 |
| 9.66E-03 | 1.10E+02 |
| 9.66E-03 | 1.11E+02 |
| 1.00E-02 | 1.02E+02 |
| 1.34E-02 | 4.82E+01 |
| 1.34E-02 | 1.10E+02 |
| 1.50E-02 | 8.18E+01 |
| 1.57E-02 | 7.24E+01 |
| 1.57E-02 | 9.88E+01 |
| 1.61E-02 | 9.40E+01 |
| 1.64E-02 | 8.94E+01 |
| 1.64E-02 | 1.03E+02 |
| 2.00E-02 | 6.21E+01 |
| 3.00E-02 | 2.18E+01 |
| 4.00E-02 | 1.04E+01 |
| 5.00E-02 | 5.83E+00 |
| 6.00E-02 | 3.66E+00 |
| 8.00E-02 | 1.79E+00 |
| 9.05E-02 | 1.33E+00 |
| 9.05E-02 | 5.08E+00 |
| 1.00E-01 | 3.96E+00 |
| 1.50E-01 | 1.46E+00 |
| 2.00E-01 | 7.44E-01 |
| 3.00E-01 | 3.19E-01 |
| 4.00E-01 | 1.95E-01 |
| 5.00E-01 | 1.42E-01 |
| 6.00E-01 | 1.14E-01 |
| 8.00E-01 | 8.50E-02 |
| 1.00E+00 | 7.02E-02 |

|          |          |
|----------|----------|
| 1.02E+00 | 6.90E-02 |
| 1.25E+00 | 5.94E-02 |
| 1.50E+00 | 5.32E-02 |
| 2.00E+00 | 4.65E-02 |
| 2.04E+00 | 4.62E-02 |
| 3.00E+00 | 4.12E-02 |
| 4.00E+00 | 3.94E-02 |
| 5.00E+00 | 3.89E-02 |

**Table S8.** Mass attenuation coefficients ( $\mu_m$ ) of wood/NR composites.

| Photon energy (MeV) | $\mu_m$ (cm <sup>2</sup> /g) |
|---------------------|------------------------------|
| 1.00E-03            | 2.19E+03                     |
| 1.01E-03            | 2.13E+03                     |
| 1.02E-03            | 2.07E+03                     |
| 1.02E-03            | 2.12E+03                     |
| 1.03E-03            | 2.08E+03                     |
| 1.04E-03            | 2.06E+03                     |
| 1.04E-03            | 2.10E+03                     |
| 1.12E-03            | 1.76E+03                     |
| 1.19E-03            | 1.48E+03                     |
| 1.19E-03            | 1.50E+03                     |
| 1.50E-03            | 7.99E+02                     |
| 2.00E-03            | 3.54E+02                     |
| 2.47E-03            | 1.92E+02                     |
| 2.47E-03            | 2.42E+02                     |
| 3.00E-03            | 1.42E+02                     |
| 4.00E-03            | 6.24E+01                     |
| 5.00E-03            | 3.28E+01                     |
| 6.00E-03            | 1.93E+01                     |
| 8.00E-03            | 8.36E+00                     |
| 9.66E-03            | 4.86E+00                     |
| 9.66E-03            | 9.82E+00                     |
| 1.00E-02            | 8.97E+00                     |
| 1.50E-02            | 3.06E+00                     |
| 2.00E-02            | 1.47E+00                     |
| 3.00E-02            | 5.90E-01                     |
| 4.00E-02            | 3.60E-01                     |
| 5.00E-02            | 2.72E-01                     |
| 6.00E-02            | 2.30E-01                     |
| 8.00E-02            | 1.91E-01                     |
| 1.00E-01            | 1.72E-01                     |
| 1.50E-01            | 1.48E-01                     |
| 2.00E-01            | 1.33E-01                     |
| 3.00E-01            | 1.15E-01                     |
| 4.00E-01            | 1.03E-01                     |
| 5.00E-01            | 9.38E-02                     |
| 6.00E-01            | 8.67E-02                     |

|          |          |
|----------|----------|
| 8.00E-01 | 7.61E-02 |
| 1.00E+00 | 6.84E-02 |
| 1.02E+00 | 6.77E-02 |
| 1.25E+00 | 6.12E-02 |
| 1.50E+00 | 5.57E-02 |
| 2.00E+00 | 4.78E-02 |
| 2.04E+00 | 4.72E-02 |
| 3.00E+00 | 3.83E-02 |
| 4.00E+00 | 3.28E-02 |
| 5.00E+00 | 2.92E-02 |

**Table S9.** Mass attenuation coefficients ( $\mu_m$ ) of 400-phr-Bi<sub>2</sub>O<sub>3</sub>/wood/NR composites.

| Photon energy (MeV) | $\mu_m$ (cm <sup>2</sup> /g) |
|---------------------|------------------------------|
| 1.00E-03            | 4.38E+03                     |
| 1.01E-03            | 4.29E+03                     |
| 1.02E-03            | 4.20E+03                     |
| 1.02E-03            | 4.22E+03                     |
| 1.03E-03            | 4.13E+03                     |
| 1.04E-03            | 4.04E+03                     |
| 1.04E-03            | 4.06E+03                     |
| 1.12E-03            | 3.52E+03                     |
| 1.19E-03            | 3.05E+03                     |
| 1.19E-03            | 3.06E+03                     |
| 1.50E-03            | 1.89E+03                     |
| 2.00E-03            | 9.96E+02                     |
| 2.47E-03            | 6.13E+02                     |
| 2.47E-03            | 6.28E+02                     |
| 2.53E-03            | 5.99E+02                     |
| 2.58E-03            | 5.70E+02                     |
| 2.58E-03            | 1.20E+03                     |
| 2.63E-03            | 1.22E+03                     |
| 2.69E-03            | 1.24E+03                     |
| 2.69E-03            | 1.69E+03                     |
| 3.00E-03            | 1.34E+03                     |
| 3.18E-03            | 1.15E+03                     |
| 3.18E-03            | 1.32E+03                     |
| 3.43E-03            | 1.10E+03                     |
| 3.70E-03            | 9.12E+02                     |
| 3.70E-03            | 9.64E+02                     |
| 3.85E-03            | 8.77E+02                     |
| 4.00E-03            | 7.99E+02                     |
| 4.00E-03            | 8.32E+02                     |
| 4.00E-03            | 8.32E+02                     |
| 5.00E-03            | 4.85E+02                     |
| 6.00E-03            | 3.10E+02                     |
| 8.00E-03            | 1.51E+02                     |
| 9.66E-03            | 9.42E+01                     |

|          |          |
|----------|----------|
| 9.66E-03 | 9.57E+01 |
| 1.00E-02 | 8.77E+01 |
| 1.34E-02 | 4.18E+01 |
| 1.34E-02 | 9.84E+01 |
| 1.50E-02 | 7.32E+01 |
| 1.57E-02 | 6.48E+01 |
| 1.57E-02 | 8.90E+01 |
| 1.61E-02 | 8.47E+01 |
| 1.64E-02 | 8.06E+01 |
| 1.64E-02 | 9.27E+01 |
| 2.00E-02 | 5.62E+01 |
| 3.00E-02 | 1.98E+01 |
| 4.00E-02 | 9.42E+00 |
| 5.00E-02 | 5.31E+00 |
| 6.00E-02 | 3.34E+00 |
| 8.00E-02 | 1.64E+00 |
| 9.05E-02 | 1.22E+00 |
| 9.05E-02 | 4.65E+00 |
| 1.00E-01 | 3.63E+00 |
| 1.50E-01 | 1.35E+00 |
| 2.00E-01 | 6.92E-01 |
| 3.00E-01 | 3.02E-01 |
| 4.00E-01 | 1.87E-01 |
| 5.00E-01 | 1.38E-01 |
| 6.00E-01 | 1.12E-01 |
| 8.00E-01 | 8.46E-02 |
| 1.00E+00 | 7.04E-02 |
| 1.02E+00 | 6.92E-02 |
| 1.25E+00 | 5.99E-02 |
| 1.50E+00 | 5.36E-02 |
| 2.00E+00 | 4.68E-02 |
| 2.04E+00 | 4.64E-02 |
| 3.00E+00 | 4.09E-02 |
| 4.00E+00 | 3.86E-02 |
| 5.00E+00 | 3.78E-02 |

**Table S10.** Mass attenuation coefficients ( $\mu_m$ ) of 800-phr-Bi<sub>2</sub>O<sub>3</sub>/wood/NR composites.

| Photon energy (MeV) | $\mu_m$ (cm <sup>2</sup> /g) |
|---------------------|------------------------------|
| 1.00E-03            | 4.78E+03                     |
| 1.01E-03            | 4.68E+03                     |
| 1.02E-03            | 4.59E+03                     |
| 1.02E-03            | 4.60E+03                     |
| 1.03E-03            | 4.50E+03                     |
| 1.04E-03            | 4.40E+03                     |
| 1.04E-03            | 4.41E+03                     |
| 1.12E-03            | 3.84E+03                     |
| 1.19E-03            | 3.34E+03                     |

|          |          |
|----------|----------|
| 1.19E-03 | 3.34E+03 |
| 1.50E-03 | 2.09E+03 |
| 2.00E-03 | 1.11E+03 |
| 2.47E-03 | 6.89E+02 |
| 2.47E-03 | 6.99E+02 |
| 2.53E-03 | 6.66E+02 |
| 2.58E-03 | 6.35E+02 |
| 2.58E-03 | 1.38E+03 |
| 2.63E-03 | 1.40E+03 |
| 2.69E-03 | 1.42E+03 |
| 2.69E-03 | 1.96E+03 |
| 3.00E-03 | 1.55E+03 |
| 3.18E-03 | 1.34E+03 |
| 3.18E-03 | 1.54E+03 |
| 3.43E-03 | 1.28E+03 |
| 3.70E-03 | 1.06E+03 |
| 3.70E-03 | 1.12E+03 |
| 3.85E-03 | 1.02E+03 |
| 4.00E-03 | 9.32E+02 |
| 4.00E-03 | 9.72E+02 |
| 4.00E-03 | 9.71E+02 |
| 5.00E-03 | 5.67E+02 |
| 6.00E-03 | 3.62E+02 |
| 8.00E-03 | 1.77E+02 |
| 9.66E-03 | 1.10E+02 |
| 9.66E-03 | 1.11E+02 |
| 1.00E-02 | 1.02E+02 |
| 1.34E-02 | 4.86E+01 |
| 1.34E-02 | 1.16E+02 |
| 1.50E-02 | 8.59E+01 |
| 1.57E-02 | 7.60E+01 |
| 1.57E-02 | 1.05E+02 |
| 1.61E-02 | 9.96E+01 |
| 1.64E-02 | 9.47E+01 |
| 1.64E-02 | 1.09E+02 |
| 2.00E-02 | 6.61E+01 |
| 3.00E-02 | 2.33E+01 |
| 4.00E-02 | 1.11E+01 |
| 5.00E-02 | 6.22E+00 |
| 6.00E-02 | 3.90E+00 |
| 8.00E-02 | 1.90E+00 |
| 9.05E-02 | 1.41E+00 |
| 9.05E-02 | 5.47E+00 |
| 1.00E-01 | 4.26E+00 |
| 1.50E-01 | 1.57E+00 |
| 2.00E-01 | 7.93E-01 |
| 3.00E-01 | 3.36E-01 |
| 4.00E-01 | 2.02E-01 |

|          |          |
|----------|----------|
| 5.00E-01 | 1.46E-01 |
| 6.00E-01 | 1.16E-01 |
| 8.00E-01 | 8.61E-02 |
| 1.00E+00 | 7.08E-02 |
| 1.02E+00 | 6.95E-02 |
| 1.25E+00 | 5.96E-02 |
| 1.50E+00 | 5.33E-02 |
| 2.00E+00 | 4.66E-02 |
| 2.04E+00 | 4.62E-02 |
| 3.00E+00 | 4.14E-02 |
| 4.00E+00 | 3.97E-02 |
| 5.00E+00 | 3.93E-02 |

**Table S11.** Mass attenuation coefficients ( $\mu_m$ ) of 400-phr-Pb/wood/NR composites.

| Photon energy (MeV) | $\mu_m$ (cm <sup>2</sup> /g) |
|---------------------|------------------------------|
| 1.00E-03            | 4.28E+03                     |
| 1.01E-03            | 4.20E+03                     |
| 1.02E-03            | 4.11E+03                     |
| 1.02E-03            | 4.13E+03                     |
| 1.03E-03            | 4.04E+03                     |
| 1.04E-03            | 3.96E+03                     |
| 1.04E-03            | 3.97E+03                     |
| 1.12E-03            | 3.46E+03                     |
| 1.19E-03            | 3.01E+03                     |
| 1.19E-03            | 3.01E+03                     |
| 1.50E-03            | 1.88E+03                     |
| 2.00E-03            | 9.99E+02                     |
| 2.47E-03            | 6.20E+02                     |
| 2.47E-03            | 6.35E+02                     |
| 2.53E-03            | 6.32E+02                     |
| 2.58E-03            | 6.28E+02                     |
| 2.58E-03            | 1.04E+03                     |
| 2.63E-03            | 1.21E+03                     |
| 2.69E-03            | 1.41E+03                     |
| 2.69E-03            | 1.76E+03                     |
| 3.00E-03            | 1.41E+03                     |
| 3.18E-03            | 1.33E+03                     |
| 3.18E-03            | 1.53E+03                     |
| 3.43E-03            | 1.28E+03                     |
| 3.70E-03            | 1.06E+03                     |
| 3.70E-03            | 1.13E+03                     |
| 3.85E-03            | 1.02E+03                     |
| 4.00E-03            | 9.30E+02                     |
| 4.00E-03            | 9.69E+02                     |
| 4.00E-03            | 8.86E+02                     |
| 5.00E-03            | 5.16E+02                     |



|          |          |
|----------|----------|
| 6.00E-03 | 3.30E+02 |
| 8.00E-03 | 1.61E+02 |
| 9.66E-03 | 1.00E+02 |
| 9.66E-03 | 1.02E+02 |
| 1.00E-02 | 9.33E+01 |
| 1.34E-02 | 4.78E+01 |
| 1.34E-02 | 1.14E+02 |
| 1.50E-02 | 7.83E+01 |
| 1.57E-02 | 7.56E+01 |
| 1.57E-02 | 1.04E+02 |
| 1.61E-02 | 9.87E+01 |
| 1.64E-02 | 9.39E+01 |
| 1.64E-02 | 1.08E+02 |
| 2.00E-02 | 6.03E+01 |
| 3.00E-02 | 2.12E+01 |
| 4.00E-02 | 1.01E+01 |
| 5.00E-02 | 5.66E+00 |
| 6.00E-02 | 3.55E+00 |
| 8.00E-02 | 1.74E+00 |
| 9.05E-02 | 1.38E+00 |
| 9.05E-02 | 5.38E+00 |
| 1.00E-01 | 3.90E+00 |
| 1.50E-01 | 1.44E+00 |
| 2.00E-01 | 7.33E-01 |
| 3.00E-01 | 3.15E-01 |
| 4.00E-01 | 1.93E-01 |
| 5.00E-01 | 1.41E-01 |
| 6.00E-01 | 1.13E-01 |
| 8.00E-01 | 8.48E-02 |
| 1.00E+00 | 7.02E-02 |
| 1.02E+00 | 6.90E-02 |
| 1.25E+00 | 5.95E-02 |
| 1.50E+00 | 5.33E-02 |
| 2.00E+00 | 4.66E-02 |
| 2.04E+00 | 4.62E-02 |
| 3.00E+00 | 4.11E-02 |
| 4.00E+00 | 3.92E-02 |
| 5.00E+00 | 3.86E-02 |

**Table S12.** Mass attenuation coefficients ( $\mu_m$ ) of 800-phr-Pb/wood/NR composites.

| Photon energy (MeV) | $\mu_m$ (cm <sup>2</sup> /g) |
|---------------------|------------------------------|
| 1.00E-03            | 4.66E+03                     |
| 1.01E-03            | 4.57E+03                     |
| 1.02E-03            | 4.48E+03                     |
| 1.02E-03            | 4.49E+03                     |
| 1.03E-03            | 4.39E+03                     |
| 1.04E-03            | 4.30E+03                     |

|          |          |
|----------|----------|
| 1.04E-03 | 4.31E+03 |
| 1.12E-03 | 3.76E+03 |
| 1.19E-03 | 3.28E+03 |
| 1.19E-03 | 3.29E+03 |
| 1.50E-03 | 2.07E+03 |
| 2.00E-03 | 1.12E+03 |
| 2.47E-03 | 6.97E+02 |
| 2.47E-03 | 7.07E+02 |
| 2.53E-03 | 7.03E+02 |
| 2.58E-03 | 6.99E+02 |
| 2.58E-03 | 1.19E+03 |
| 2.63E-03 | 1.39E+03 |
| 2.69E-03 | 1.63E+03 |
| 2.69E-03 | 2.04E+03 |
| 3.00E-03 | 1.63E+03 |
| 3.18E-03 | 1.54E+03 |
| 3.18E-03 | 1.78E+03 |
| 3.43E-03 | 1.49E+03 |
| 3.70E-03 | 1.24E+03 |
| 3.70E-03 | 1.31E+03 |
| 3.85E-03 | 1.19E+03 |
| 4.00E-03 | 1.09E+03 |
| 4.00E-03 | 1.13E+03 |
| 4.00E-03 | 1.04E+03 |
| 5.00E-03 | 6.04E+02 |
| 6.00E-03 | 3.86E+02 |
| 8.00E-03 | 1.89E+02 |
| 9.66E-03 | 1.18E+02 |
| 9.66E-03 | 1.18E+02 |
| 1.00E-02 | 1.09E+02 |
| 1.34E-02 | 5.57E+01 |
| 1.34E-02 | 1.34E+02 |
| 1.50E-02 | 9.19E+01 |
| 1.57E-02 | 8.88E+01 |
| 1.57E-02 | 1.22E+02 |
| 1.61E-02 | 1.16E+02 |
| 1.64E-02 | 1.11E+02 |
| 1.64E-02 | 1.27E+02 |
| 2.00E-02 | 7.10E+01 |
| 3.00E-02 | 2.49E+01 |
| 4.00E-02 | 1.18E+01 |
| 5.00E-02 | 6.63E+00 |
| 6.00E-02 | 4.15E+00 |
| 8.00E-02 | 2.02E+00 |
| 9.05E-02 | 1.60E+00 |
| 9.05E-02 | 6.32E+00 |
| 1.00E-01 | 4.57E+00 |
| 1.50E-01 | 1.68E+00 |

|          |          |
|----------|----------|
| 2.00E-01 | 8.42E-01 |
| 3.00E-01 | 3.51E-01 |
| 4.00E-01 | 2.09E-01 |
| 5.00E-01 | 1.49E-01 |
| 6.00E-01 | 1.18E-01 |
| 8.00E-01 | 8.64E-02 |
| 1.00E+00 | 7.05E-02 |
| 1.02E+00 | 6.93E-02 |
| 1.25E+00 | 5.92E-02 |
| 1.50E+00 | 5.29E-02 |
| 2.00E+00 | 4.64E-02 |
| 2.04E+00 | 4.60E-02 |
| 3.00E+00 | 4.16E-02 |
| 4.00E+00 | 4.03E-02 |
| 5.00E+00 | 4.03E-02 |

**Table S13.** Mass attenuation coefficients ( $\mu_m$ ) of 400-phr-Bi<sub>2</sub>S<sub>3</sub>/wood/NR composites.

| Photon energy (MeV) | $\mu_m$ (cm <sup>2</sup> /g) |
|---------------------|------------------------------|
| 1.00E-03            | 4.05E+03                     |
| 1.01E-03            | 3.97E+03                     |
| 1.02E-03            | 3.89E+03                     |
| 1.02E-03            | 3.90E+03                     |
| 1.03E-03            | 3.82E+03                     |
| 1.04E-03            | 3.74E+03                     |
| 1.04E-03            | 3.75E+03                     |
| 1.12E-03            | 3.25E+03                     |
| 1.19E-03            | 2.82E+03                     |
| 1.19E-03            | 2.83E+03                     |
| 1.50E-03            | 1.74E+03                     |
| 2.00E-03            | 9.18E+02                     |
| 2.47E-03            | 5.65E+02                     |
| 2.47E-03            | 8.20E+02                     |
| 2.53E-03            | 7.82E+02                     |
| 2.58E-03            | 7.46E+02                     |
| 2.58E-03            | 1.32E+03                     |
| 2.63E-03            | 1.32E+03                     |
| 2.69E-03            | 1.33E+03                     |
| 2.69E-03            | 1.74E+03                     |
| 3.00E-03            | 1.37E+03                     |
| 3.18E-03            | 1.19E+03                     |
| 3.18E-03            | 1.34E+03                     |
| 3.43E-03            | 1.11E+03                     |
| 3.70E-03            | 9.23E+02                     |
| 3.70E-03            | 9.70E+02                     |
| 3.85E-03            | 8.82E+02                     |
| 4.00E-03            | 8.02E+02                     |
| 4.00E-03            | 8.32E+02                     |

|          |          |
|----------|----------|
| 4.00E-03 | 8.32E+02 |
| 5.00E-03 | 4.82E+02 |
| 6.00E-03 | 3.07E+02 |
| 8.00E-03 | 1.49E+02 |
| 9.66E-03 | 9.22E+01 |
| 9.66E-03 | 9.38E+01 |
| 1.00E-02 | 8.59E+01 |
| 1.34E-02 | 4.06E+01 |
| 1.34E-02 | 9.19E+01 |
| 1.50E-02 | 6.83E+01 |
| 1.57E-02 | 6.04E+01 |
| 1.57E-02 | 8.24E+01 |
| 1.61E-02 | 7.84E+01 |
| 1.64E-02 | 7.45E+01 |
| 1.64E-02 | 8.55E+01 |
| 2.00E-02 | 5.18E+01 |
| 3.00E-02 | 1.82E+01 |
| 4.00E-02 | 8.66E+00 |
| 5.00E-02 | 4.88E+00 |
| 6.00E-02 | 3.07E+00 |
| 8.00E-02 | 1.51E+00 |
| 9.05E-02 | 1.13E+00 |
| 9.05E-02 | 4.24E+00 |
| 1.00E-01 | 3.31E+00 |
| 1.50E-01 | 1.24E+00 |
| 2.00E-01 | 6.40E-01 |
| 3.00E-01 | 2.84E-01 |
| 4.00E-01 | 1.79E-01 |
| 5.00E-01 | 1.33E-01 |
| 6.00E-01 | 1.09E-01 |
| 8.00E-01 | 8.35E-02 |
| 1.00E+00 | 6.99E-02 |
| 1.02E+00 | 6.88E-02 |
| 1.25E+00 | 5.97E-02 |
| 1.50E+00 | 5.36E-02 |
| 2.00E+00 | 4.67E-02 |
| 2.04E+00 | 4.63E-02 |
| 3.00E+00 | 4.07E-02 |
| 4.00E+00 | 3.82E-02 |
| 5.00E+00 | 3.72E-02 |

**Table S14.** Mass attenuation coefficients ( $\mu_m$ ) of 800-phr-Bi<sub>2</sub>S<sub>3</sub>/wood/NR composites.

| Photon energy (MeV) | $\mu_m$ (cm <sup>2</sup> /g) |
|---------------------|------------------------------|
| 1.00E-03            | 4.39E+03                     |
| 1.01E-03            | 4.30E+03                     |
| 1.02E-03            | 4.22E+03                     |
| 1.02E-03            | 4.22E+03                     |

|          |          |
|----------|----------|
| 1.03E-03 | 4.13E+03 |
| 1.04E-03 | 4.04E+03 |
| 1.04E-03 | 4.05E+03 |
| 1.12E-03 | 3.52E+03 |
| 1.19E-03 | 3.07E+03 |
| 1.19E-03 | 3.07E+03 |
| 1.50E-03 | 1.92E+03 |
| 2.00E-03 | 1.02E+03 |
| 2.47E-03 | 6.32E+02 |
| 2.47E-03 | 9.25E+02 |
| 2.53E-03 | 8.83E+02 |
| 2.58E-03 | 8.42E+02 |
| 2.58E-03 | 1.51E+03 |
| 2.63E-03 | 1.52E+03 |
| 2.69E-03 | 1.54E+03 |
| 2.69E-03 | 2.02E+03 |
| 3.00E-03 | 1.60E+03 |
| 3.18E-03 | 1.38E+03 |
| 3.18E-03 | 1.56E+03 |
| 3.43E-03 | 1.30E+03 |
| 3.70E-03 | 1.08E+03 |
| 3.70E-03 | 1.13E+03 |
| 3.85E-03 | 1.03E+03 |
| 4.00E-03 | 9.36E+02 |
| 4.00E-03 | 9.72E+02 |
| 4.00E-03 | 9.71E+02 |
| 5.00E-03 | 5.64E+02 |
| 6.00E-03 | 3.59E+02 |
| 8.00E-03 | 1.74E+02 |
| 9.66E-03 | 1.08E+02 |
| 9.66E-03 | 1.09E+02 |
| 1.00E-02 | 9.98E+01 |
| 1.34E-02 | 4.72E+01 |
| 1.34E-02 | 1.08E+02 |
| 1.50E-02 | 8.01E+01 |
| 1.57E-02 | 7.09E+01 |
| 1.57E-02 | 9.68E+01 |
| 1.61E-02 | 9.21E+01 |
| 1.64E-02 | 8.76E+01 |
| 1.64E-02 | 1.01E+02 |
| 2.00E-02 | 6.09E+01 |
| 3.00E-02 | 2.14E+01 |
| 4.00E-02 | 1.02E+01 |
| 5.00E-02 | 5.72E+00 |
| 6.00E-02 | 3.59E+00 |
| 8.00E-02 | 1.75E+00 |
| 9.05E-02 | 1.30E+00 |
| 9.05E-02 | 4.98E+00 |

|          |          |
|----------|----------|
| 1.00E-01 | 3.88E+00 |
| 1.50E-01 | 1.44E+00 |
| 2.00E-01 | 7.32E-01 |
| 3.00E-01 | 3.15E-01 |
| 4.00E-01 | 1.93E-01 |
| 5.00E-01 | 1.41E-01 |
| 6.00E-01 | 1.13E-01 |
| 8.00E-01 | 8.48E-02 |
| 1.00E+00 | 7.02E-02 |
| 1.02E+00 | 6.90E-02 |
| 1.25E+00 | 5.94E-02 |
| 1.50E+00 | 5.32E-02 |
| 2.00E+00 | 4.66E-02 |
| 2.04E+00 | 4.62E-02 |
| 3.00E+00 | 4.11E-02 |
| 4.00E+00 | 3.92E-02 |
| 5.00E+00 | 3.87E-02 |

---
